# Supplementary material for: Sub1 contacts the RNA polymerase II stalk to modulate mRNA synthesis
Source: PubMed Central journal article supplement — Nucleic Acids Res. 2016 Dec 6;45(5):2458–71. doi: 10.1093/nar/gkw1206 (PMC5389574; doi:10.1093/nar/gkw1206), 2016-12-06
Supplement: gkw1206_Supp.pdf [file gkw1206_Supp.pdf]

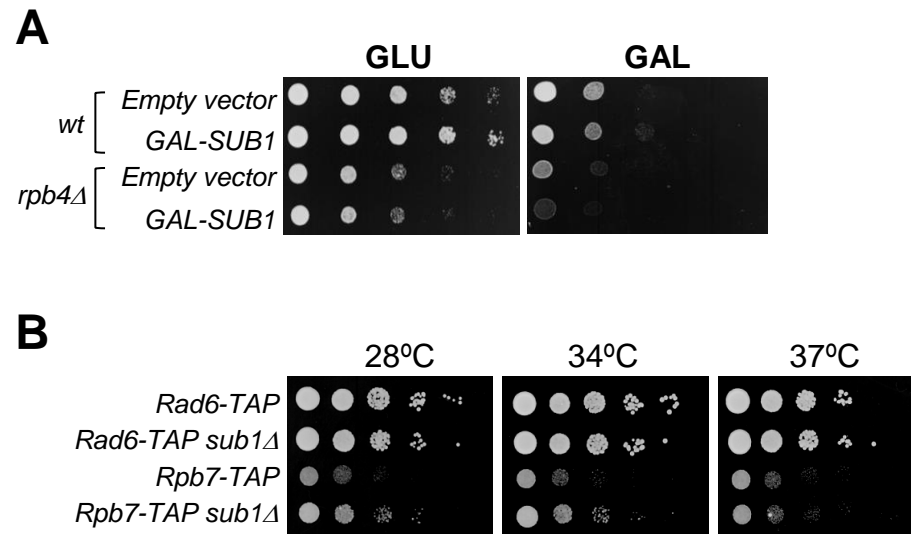

Figure S1

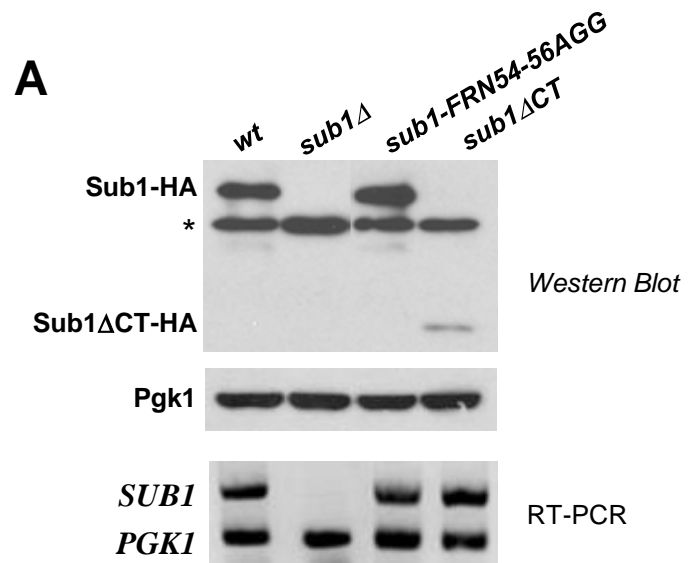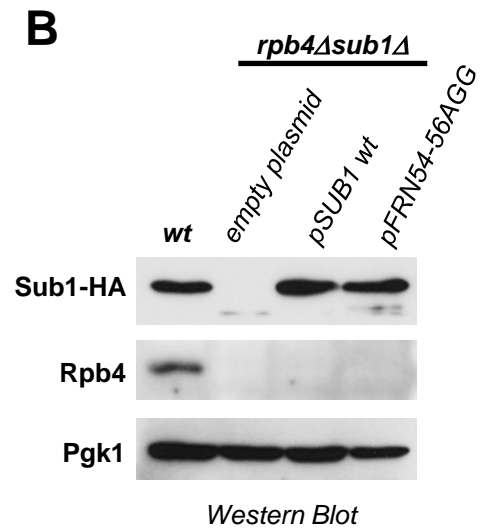

Figure S2

## SUPPLEMENTARY DATA FIGURE LEGENDS

### FIGURE S1.

**Genetic interaction between *SUB1* and *RPB4-7*.** (A) *SUB1* overexpression exacerbates the slow growth phenotype of *rpb4Δ* strain at 28°C. *SUB1* was overexpressed from the strong inducible promoter *GALI*. Serial dilutions (1:10) of *wt* and mutant strain with either and empty plasmid or containing *GAL-SUB1* were spotted on SC media containing glucose or galactose for 2-3 days. (B). C-terminal TAP tagging of Rpb7 causes growth phenotypes. *SUB1* deletion partially suppresses the growth phenotype of the Rpb7-TAP mutant strain at 28 and 34°C. Rad6-TAP strain was used as negative control.

### FIGURE S2

(A) Left panel: WCE were prepared from *wt*, *sub1Δ*, *sub1-FRN54-56AGG* and *sub1ΔCT-HA* and analyzed by Western blotting using the indicated antibodies. Left panel: RT-PCR using RNA isolated from the same strains as in the left panel, showing *SUB1* and *PGK1* mRNA levels. (\*) Unspecific band. Right panel: WCE were prepared from *wt and* double mutant *rpb4Δsub1Δ* strains transformed with the indicated plasmids and analyzed by Western blotting using the indicated antibodies.

| <b>STRAIN</b> | <b>GENOTYPE</b>                                                                                                                                                    | <b>SOURCE</b> |
|---------------|--------------------------------------------------------------------------------------------------------------------------------------------------------------------|---------------|
| OCSC0101      | <i>MATa, ade2-1 his 3-11,15 leu2-3,112 trp1-1 ura3-1</i>                                                                                                           | (1)           |
| OCSC1412      | <i>MATa, ade2-1 his 3-11,15 leu2-3,112 trp1-1 ura3-1 Sub1-TAP::TRP1</i>                                                                                            | This study    |
| OCSC1725      | <i>MATa, ade2-1 his 3-11,15 leu2-3,112 trp1-1 ura3-1 Sub1-TAP::TRP1 Rpb7-3HA::KanMX</i>                                                                            | This study    |
| OCSC1732      | <i>MATa, ade2-1 his 3-11,15 leu2-3,112 trp1-1 ura3-1 Rpb7-3HA::KanMX</i>                                                                                           | This study    |
| OCSC2829      | <i>MATa, ade2-1 his 3-11,15 leu2-3,112 trp1-1 ura3-1 Sub1-TAP::TRP1 Rpb7-3HA::KanMX Rpb4-3HA::HIS3</i>                                                             | This study    |
| OCSC1851      | <i>MATa, ade2-1 his 3-11,15 leu2-3,112 trp1-1 ura3-1 Sub1-TAP::TRP1 Rpb7-3HA::KanMX rpb4::HIS3</i>                                                                 | This study    |
| OCSC1434      | <i>MATa, ade2-1 his 3-11,15 leu2-3,112 trp1-1 ura3-1 Sub1-6HA::TRP1</i>                                                                                            | (2)           |
| OCSC2002      | <i>MATa, ade2-1 his 3-11,15 leu2-3,112 trp1-1 ura3-1 Sub1-6HA::TRP1 rpb4::KanMX</i>                                                                                | This study    |
| OCSC1849      | <i>MATa, ade2-1 his 3-11,15 leu2-3,112 trp1-1 ura3-1 Rpb7-3HA::KanMX rpb4::HIS3</i>                                                                                | This study    |
| OCSC2773      | <i>MAT<math>\alpha</math>, his3<math>\Delta</math>1 leu2<math>\Delta</math>0 met15<math>\Delta</math>0 ura3<math>\Delta</math>0 trp1Sub1-TAP::URA3</i>             | This study    |
| OCSC2774      | <i>MAT<math>\alpha</math>, his3<math>\Delta</math>1 leu2<math>\Delta</math>0 met15<math>\Delta</math>0 ura3<math>\Delta</math>0 trp1Sub1-TAP::URA3 rpb1-L1397S</i> | This study    |
| OCSC1164      | <i>MATa,his3<math>\Delta</math>1 leu2<math>\Delta</math>0 ura3<math>\Delta</math>0 Sub1-TAP-URA</i>                                                                | This study    |
| OCSC1762      | <i>MATa,his3<math>\Delta</math>1 leu2<math>\Delta</math>0 ura3<math>\Delta</math>0 Sub1-TAP-URA rpb4::HIS3</i>                                                     | This study    |
| OCSC0162      | <i>MATa, ade2-1 his 3-11,15 leu2-3,112 trp1-1 ura3-1 [pRS316]</i>                                                                                                  | This study    |
| OCSC0163      | <i>MATa, ade2-1 his 3-11,15 leu2-3,112 trp1-1 ura3-1 sub1::URA3</i>                                                                                                | (3)           |
| OCSC2004      | <i>MATa, ade2-1 his 3-11,15 leu2-3,112 trp1-1 ura3-1 rpb4::HIS3 [pRS316]</i>                                                                                       | This study    |
| OCSC2006      | <i>MATa, ade2-1 his 3-11,15 leu2-3,112 trp1-1 ura3-1 rpb4::HIS3 sub1::URA3</i>                                                                                     | This study    |
| OCSC0830      | <i>MATa, ade2-1 his 3-11,15 leu2-3,112 trp1-1 ura3-1 [pADH1-SUB1, URA3]</i>                                                                                        | This study    |
| OCSC2007      | <i>MATa, ade2-1 his 3-11,15 leu2-3,112 trp1-1 ura3-1 rpb4::HIS3 [pADH1-SUB1, URA3]</i>                                                                             | This study    |
| OCSC1519      | <i>MAT<math>\alpha</math>, ura3-52 his3D200 leu2-3,112 trp1-D63 rpb1D187::HIS3 [pYEB220 2m LEU] [pRS316]</i>                                                       | This study    |
| OCSC1520      | <i>MAT<math>\alpha</math>, ura3-52 his3D200 leu2-3,112 trp1-D63 rpb1D187::HIS3 [pYEB220 2m LEU] sub1::URA3</i>                                                     | This study    |
| OCSC1525      | <i>MAT<math>\alpha</math>, ura3-52 his3D200 leu2-3,112 trp1-D63 rpb1D187::HIS3 [pYEB220-rpo21-4, LEU] [pRS316]</i>                                                 | This study    |
| OCSC1526      | <i>MAT<math>\alpha</math>, ura3-52 his3D200 leu2-3,112 trp1-D63 rpb1D187::HIS3 [pYEB220-rpo21-4, 2m LEU] sub1::URA3</i>                                            | This study    |
| D711-13B      | <i>MAT<math>\alpha</math>, his3<math>\Delta</math>1 leu2<math>\Delta</math>0 met15<math>\Delta</math>0 trp1 rpb1-L1397S</i>                                        | (4)           |
| OCSC1529      | <i>MAT<math>\alpha</math>, ura3-52 his3D200 leu2-3,112 trp1-D63 rpb1D187::HIS3 [pRPB1,LEU] [pRS316]</i>                                                            | This study    |
| OCSC1530      | <i>MAT<math>\alpha</math>, ura3-52 his3D200 leu2-3,112 trp1-D63 rpb1D187::HIS3 [pRPB1,LEU] sub1::URA3</i>                                                          | This study    |
| OCSC1534      | <i>MAT<math>\alpha</math>, ura3-52 his3D200 leu2-3,112 trp1-D63 rpb1D187::HIS3 [pRPB1-rpb1-19,LEU] [pRS316]</i>                                                    | This study    |
| OCSC1535      | <i>MAT<math>\alpha</math>, ura3-52 his3D200 leu2-3,112 trp1-D63 rpb1D187::HIS3 [pRPB1-rpb1-19,LEU] sub1::URA3</i>                                                  | This study    |
| OCSC1740      | <i>MATa, ade2-1 his 3-11,15 leu2-3,112 trp1-1 ura3-1 sub1::URA3 [pSUB1-HA-TRP]</i>                                                                                 | This study    |
| OCSC1739      | <i>MATa, ade2-1 his 3-11,15 leu2-3,112 trp1-1 ura3-1 sub1::URA3 [pTRP]</i>                                                                                         | This study    |

|           |                                                                                                           |            |
|-----------|-----------------------------------------------------------------------------------------------------------|------------|
| OCSC1742  | <i>MATa, ade2-1 his 3-11,15 leu2-3,112 trp1-1 ura3-1 sub1::URA3 [pSUB1-FRN54-56AGG-HA-TRP]</i>            | This study |
| OCSC1712  | <i>MATa, ade2-1 his 3-11,15 leu2-3,112 trp1-1 ura3-1 sub1::URA3 [pSUB1-ΔCT-HA-TRP]</i>                    | This study |
| OCSC1063  | <i>MATa, ade2-1 his 3-11,15 leu2-3,112 trp1-1 ura3-1 sub1ΔCT::TRP</i>                                     | This study |
| OCSC2825  | <i>MATa, ade2-1 his 3-11,15 leu2-3,112 trp1-1 ura3-1</i>                                                  | This study |
| OCSC2826  | <i>MATα, ade2-1 his 3-11,15 leu2-3,112 trp1-1 ura3-1 sub1ΔCT::TRP</i>                                     | This study |
| OCSC2827  | <i>MATa, ade2-1 his 3-11,15 leu2-3,112 trp1-1 ura3-1 rpb4::HIS3</i>                                       | This study |
| OCSC2828  | <i>MATα, ade2-1 his 3-11,15 leu2-3,112 trp1-1 ura3-1 sub1ΔCT::TRP rpb4::HIS3</i>                          | This study |
| OCSC2857  | <i>MATa, ade2-1 his 3-11,15 leu2-3,112 trp1-1 ura3-1 rpb4::HIS3 sub1::URA3 [pTRP]</i>                     | This study |
| OCSC2858  | <i>MATa, ade2-1 his 3-11,15 leu2-3,112 trp1-1 ura3-1 rpb4::HIS3 sub1::URA3 [pSUB1-HA-TRP]</i>             | This study |
| OCSC2859  | <i>MATa, ade2-1 his 3-11,15 leu2-3,112 trp1-1 ura3-1 rpb4::HIS3 sub1::URA3 [pSUB1-FRN54-56AGG-HA-TRP]</i> | This study |
| OCSC2868  | <i>MATa, ade2-1 his 3-11,15 leu2-3,112 trp1-1 ura3-1 sub1ΔCT-6HA::TRP</i>                                 | This study |
| OCSC2869  | <i>MATa, ade2-1 his 3-11,15 leu2-3,112 trp1-1 ura3-1 sub1ΔCT-6HA::TRP rpb4::HIS3</i>                      | This study |
| OCSC0979  | <i>MATa, ade2-1 his 3-11,15 leu2-3,112 trp1-1 ura3-1 Sub1-6HA::TRP1 Fcp1-13MYC::HIS3</i>                  | This study |
| MKY1512   | <i>MATα, his3Δ1 leu2Δ0 ura3Δ0 rpb1-CTDwt-NAT</i>                                                          | (5)        |
| MKY1511   | <i>MATα, his3Δ1 leu2Δ0 ura3Δ0 rpb1-CTD20-NAT</i>                                                          | (5)        |
| MKY1508   | <i>MATα, his3Δ1 leu2Δ0 ura3Δ0 rpb1-CTD11-NAT</i>                                                          | (5)        |
| OCSC2761  | <i>MATα, his3Δ1 leu2Δ0 ura3Δ0 rpb1-CTDwt-NAT [pRS316]</i>                                                 | This study |
| OCSC2763  | <i>MATα, his3Δ1 leu2Δ0 ura3Δ0 rpb1-CTDwt-NAT sub1::URA3</i>                                               | This study |
| OCSC2767  | <i>MATα, his3Δ1 leu2Δ0 ura3Δ0 rpb1-CTD11-NAT pRS316</i>                                                   | This study |
| OCSC2769  | <i>MATα, his3Δ1 leu2Δ0 ura3Δ0 rpb1-CTD11-NAT sub1::URA3</i>                                               | This study |
| OCSC 2736 | <i>MATa, his3Δ1 leu2Δ0 ura3Δ0 rpb1-CTDwt-NAT Sub1-TAP-URA</i>                                             | This study |
| OCSC 2740 | <i>MATa, his3Δ1 leu2Δ0 ura3Δ0 rpb1-CTD20-NAT Sub1-TAP-URA</i>                                             | This study |
| OCSC 2744 | <i>MATα, his3Δ1 leu2Δ0 ura3Δ0 rpb1-CTD11-NAT Sub1-TAP-URA</i>                                             | This study |
| OCSC1610  | <i>MATa, ade2 arg4 leu2-3,112 trp1-298 ura3-52 RPB7::TAP-K.l-URA3</i>                                     | This study |
| OCSC1622  | <i>MATa, ade2 arg4 leu2-3,112 trp1-298 ura3-52 RPB7::TAP-K.l-URA3 sub1::TRP1</i>                          | This study |
| OCSC1474  | <i>MATa, ade2 arg4 leu2-3,112 trp1-298 ura3-52 RAD6::TAP-K.l-URA3</i>                                     | This study |
| OCSC1655  | <i>MATa, ade2 arg4 leu2-3,112 trp1-298 ura3-52 RAD6::TAP-K.l-URA3 sub1::KanMX</i>                         | This study |
| OCSC2137  | <i>MATa, his3Δ1 leu2Δ0 met15Δ0 ura3Δ0 Spt5-HA::HIS3</i>                                                   | This study |
| OCSC2138  | <i>MATa, his3Δ1 leu2Δ0 met15Δ0 ura3Δ0 Spt5-HA::HIS3 rpb4::KanMX</i>                                       | This study |

**Table I.** Yeast strains

## REFERENCES

1. Thomas, B.J. and Rothstein, R. (1989) Elevated recombination rates in transcriptionally active DNA. *Cell*, **56**, 619-630.
2. Garcia, A., Collin, A. and Calvo, O. (2012) Sub1 associates with Spt5 and influences RNA polymerase II transcription elongation rate. *Mol. Biol. Cell*, **23**, 4297-4312.
3. Garcia, A., Rosonina, E., Manley, J.L. and Calvo, O. (2010) Sub1 globally regulates RNA polymerase II C-terminal domain phosphorylation. *Mol. Cell. Biol.*, **30**, 5180-5193.
4. Kwapisz, M., Wery, M., Despres, D., Ghavi-Helm, Y., Soutourina, J., Thuriaux, P. and Lacroute, F. (2008) Mutations of RNA polymerase II activate key genes of the nucleoside triphosphate biosynthetic pathways. *EMBO J.*, **27**, 2411-2421.
5. Aristizabal, M.J., Negri, G.L., Benschop, J.J., Holstege, F.C., Krogan, N.J. and Kobor, M.S. (2013) High-throughput genetic and gene expression analysis of the RNAPII-CTD reveals unexpected connections to SRB10/CDK8. *PLoS Genet*, **9**, e1003758.
